# Supplementary material for: Reducing the inversion degree of MnFe2O4nanoparticles through synthesis to enhance magnetization: evaluation of their1H NMR relaxation and heating efficiency
Source: Royal Society of Chemistry journal article supplement (doi:10.1039/c4dt00162a), 2014-01-01
Supplement: c4dt00162a1.pdf [file c4dt00162a1.pdf]

## Reducing the inversion degree of $\text{MnFe}_2\text{O}_4$ nanoparticles through synthesis to enhance magnetization; Evaluation of their $^1\text{H}$ NMR relaxation and heating efficiency

K. Vamvakidis,<sup>a</sup> M. Katsikini,<sup>b</sup> D. Sakellari,<sup>b</sup> E. C. Paloura,<sup>b</sup> O. Kalogirou,<sup>b</sup> C. Dendrinou-Samara<sup>a,\*</sup>

<sup>a</sup>Department of Chemistry, Aristotle University of Thessaloniki, 54124 Thessaloniki, Greece; \*e-mail: [samkat@chem.auth.gr](mailto:samkat@chem.auth.gr)

<sup>b</sup>Department of Physics, Aristotle University of Thessaloniki, 54124 Thessaloniki, Greece

### † Electronic supplementary information (ESI)

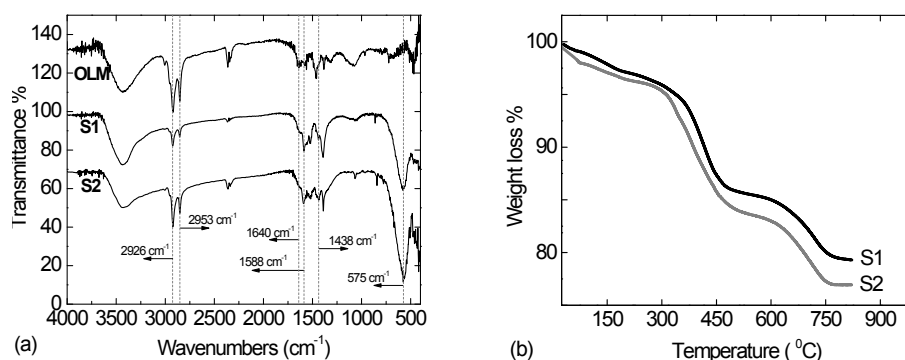

**Fig. 1S** (a) FT-IR spectra and (b) TGA curves of samples S1 and S2.

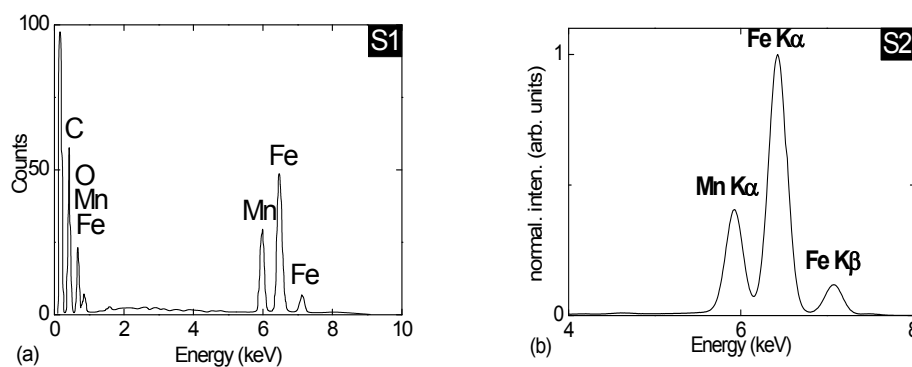

**Fig. 2S** Representative EDS (a) and XRF (b) spectra of S1 and S2, respectively.

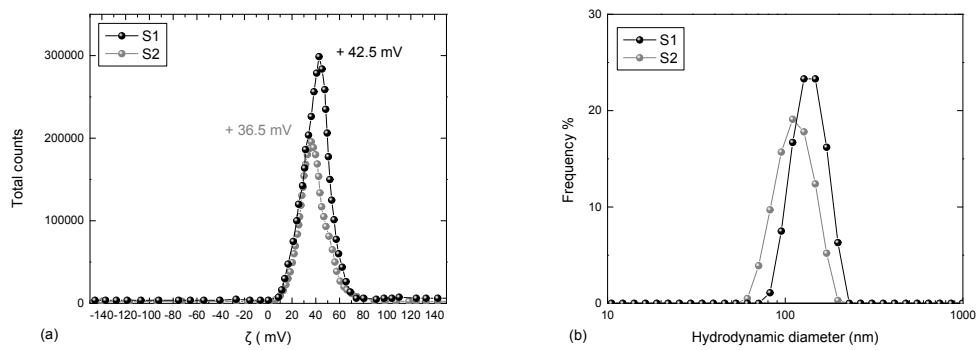

**Fig. 3S** (a) Zeta potential ( $\zeta$ ) distribution of samples measured at neutral suspension pH. (b) Particle size distribution of the CTAB-coated nanoparticles in water by DLS.
